# Supplementary material
Source: Elsevier journal article supplement (https://www.sciencedirect.com/science/article/pii/S0186104216300687)
Supplement: mmc1 [file S0186104216300687:mmc1.doc]

**Appendix**

**Annex table 1**

Roots of the characteristic polynomial

| Endogenous variables: CICLOCP CICLOFBCFPRIV CICLOFBCFPUB CICLOGDP CICLOGP CICLOM CICLOPIB CICLOX | |
| --- | --- |
| Exogenous variables: C | |
| Specification Lag: 1 2 | |
| Date: 09/21/14 Hour: 12:58 | |
|  |  |
|  |  |
| Root | Module |
|  |  |
|  |  |
| 0.832292 - 0.212907i | 0.859092 |
| 0.832292 + 0.212907i | 0.859092 |
| 0.748937 - 0.365826i | 0.833508 |
| 0.748937 + 0.365826i | 0.833508 |
| 0.831136 | 0.831136 |
| 0.436760 - 0.374411i | 0.575276 |
| 0.436760 + 0.374411i | 0.575276 |
| 0.106691 - 0.468020i | 0.480027 |
| 0.106691 + 0.468020i | 0.480027 |
| 0.325933 - 0.133264i | 0.352124 |
| 0.325933 + 0.133264i | 0.352124 |
| -0.317046 | 0.317046 |
| -0.188418 - 0.215425i | 0.286198 |
| -0.188418 + 0.215425i | 0.286198 |
| -0.011702 - 0.162599i | 0.163020 |
| -0.011702 + 0.162599i | 0.163020 |
|  |  |
|  |  |
| There is no root outside the unit circle VAR satisfies the stability condition. | |

**Annex table 2**

**Granger-causality test to VAR model**

**Block Exogeneity Wald Test**

Sample: 1993Q1 2013Q4

Number of observations: 81

| | Dependent variable: CICLOPIB | | |  |  | | --- | --- | --- | --- | --- | |  |  |  |  | | |  |  |  |  | | | Excluded | Chi-square | df | Prob. | | |  |  |  |  | | |  |  |  |  | | | CICLOCP | 4.226454 | 2 | 0.1208 | | | CICLOFBCFPRIV | 1.740859 | 2 | 0.4188 | | | CICLOFBCFPUB | 1.625762 | 2 | 0.4436 | | | CICLOGDP | 9.794347 | 2 | 0.0075 | | | CICLOGP | 2.167984 | 2 | 0.3382 | | | CICLOM | 3.266858 | 2 | 0.1953 | | | CICLOX | 0.733478 | 2 | 0.6930 | | |  |  |  |  | | |  |  |  |  | | | All | 32.93557 | 14 | 0.0029 | | |
| --- | --- | --- | --- | --- | --- | --- | --- | --- | --- | --- | --- | --- | --- | --- | --- | --- | --- | --- | --- | --- | --- | --- | --- | --- | --- | --- | --- | --- | --- | --- | --- | --- | --- | --- | --- | --- | --- | --- | --- | --- | --- | --- | --- | --- | --- | --- | --- | --- | --- | --- | --- | --- | --- | --- | --- | --- | --- | --- | --- | --- | --- | --- | --- | --- | --- | --- | --- | --- | --- | --- | --- | --- | --- | --- | --- | --- | --- | --- | --- | --- |
